# Supplementary material for: Genetic responses to seasonal variation in altitudinal stress: whole-genome resequencing of great tit in eastern Himalayas
Source: PubMed Central journal article supplement (PMC4585896; doi:10.1038/srep14256), 2015-09-25

## Supplementary information

Genetic responses to seasonal variation in altitudinal stress: whole-genome resequencing of great tit in eastern Himalayas

Yanhua Qu<sup>1,4</sup>, Shilin Tian<sup>2,4</sup>, Najjian Han<sup>1</sup>, Hongwei Zhao<sup>2</sup>, Bin Gao<sup>1</sup>, Jun Fu<sup>2</sup>, Yalin Cheng<sup>1</sup>, Gang Song<sup>1</sup>, Per G. P. Ericson<sup>3</sup>, Yong E. Zhang<sup>1</sup>, Dawei Wang<sup>2</sup>, Qing Quan<sup>1</sup>, Zhi Jiang<sup>2</sup>, Ruiqiang Li<sup>2</sup>, Fumin Lei<sup>1\*</sup>

1. Key Laboratory of Zoological Systematics and Evolution, Institute of Zoology, Chinese Academy of Sciences, Beijing 100101, China.
2. Novogene Bioinformatics Institute, Beijing 100083, China
3. Department of Vertebrate Zoology, Swedish Museum of Natural History, PO Box 50007, SE-10405 Stockholm, Sweden.
4. These authors contributed equally to this work.

\* Corresponding author

Email: [leifm@ioz.ac.cn](mailto:leifm@ioz.ac.cn) (F.L.)

## Supplementary Notes

Supplementary Note 1. SNPs genetic diversity.

Supplementary Note 2. Description of genes relevance to hypoxia adaptation.

## Supplementary Tables

Supplementary Table S1. Pairwise  $F_{ST}$  between the three great tit groups.

Supplementary Table S2. 183 genes showed signal of positive selection in the [eastern Himalayas](#) great tits.

Supplementary Table S3. Functional gene categories enriched for the high altitude great tits (the [eastern Himalayas](#)) compared to lowland great tits (Central/East China and Mongolia).

Supplementary Table S4. 20 hypoxia genes showed signatures of selection in high altitude great tits.

Supplementary Table S5. Biometrical measurement of three great tit groups.

Supplementary Table S6. Positive selection in the fatty-acid metabolism pathways of ground tit (*Parus humilis*).

Supplementary Table S7. Sampling information of the great tits used in this study.

Supplementary Table S8. Statistics of reads mapping and coverage.

Supplementary Table S9. Statistics of SNPs in whole genome of great tit.

## Supplementary Figures

Supplementary Figure S1. Sampling sites of the great tit and ecological subregions within the eastern Himalayas (ArcGIS 9.0, ESRI). Our sampling in the eastern Himalayas covered two zoogeographic subregions, the South-West Mountain Subregion and the Diannan Mountain Subregion.

Supplementary Figure S2. Divergent selection on the 20 hypoxia response genes. (a) gene trees of *ALOX5*, *CAMK2G*, *CHRNA7*, *CREB1*, *EP300*, *F2R*, *ITGA2*, *ITGA6*, *ITPR2*, *LAMB1*, *LAMB4*, *MAPK1*, *NFKB2*, *PIK3CG*, *PRKAA1*, *PTPN5*, *RPS6KA3*, *RPS6KA5*, *THBS4* and *VWF* estimated using TreeBeST. Red, the eastern Himalayas great tits; green, the Central/East China great tits; blue, the Mongolian great tits. (b) genes showing strong selective signals in the eastern Himalayas great tits.  $F_{ST}$  values,  $\theta/\pi$  ratios and Tajima's  $D$  values were calculated using a 10-kb sliding window. Genomic regions located above the upper horizontal dashed line in  $F_{ST}$  plot (corresponding to a 5% significance level of values, where  $F_{ST}$  was 0.425) and  $\theta/\pi$  ratio plot (a 5% significance level of the  $\theta/\pi$  ratio, where the  $\theta/\pi$  ratio is 1.58) were termed as regions with signals for strong selective sweep in high altitude great tits (gray regions). The green lines in the Tajima's  $D$  plots represent great tits in the eastern Himalayas and blue lines great tits in Mongolia and Central/East China. Genome annotations were shown at the bottom (black bar, Coding DNA sequences (CDs); red bar, genes). The boundaries of these genes were marked in blue.

Supplementary Figure S3. Sequence assemblies of four genes (*LAMB4*, *THBS4*, *ITGA2* and *F2R*) for which between 16 to 32 individuals of great tits have been Sanger sequenced. The selection analysis confirmed that observed amid acid substitutions were nearly fixed in the eastern Himalayas population.

Supplementary Figure S4. Box plots of the biometrical measurement of three groups of the great tits plotted using GGPLOT 2 [6] in R 3.1.1 [7].

## Supplementary Note 1. SNPs genetic diversity

Whole genome resequencing of 32 great tits (Fig. 1a and Supplementary Table S7) generated a total of 197.84 Gb data (100 bp paired-end reads). The raw reads were processed by Illumina HiSeq control software and resulted in 186.32 Gb of clean data, mostly to an approximately 5x depth and >90% coverage (Supplementary Table S8). We identified a total of 3,613,365 SNPs for subsequently analysis. The numbers of SNPs in the great tits in the eastern Himalayas, Central/East China and Mongolia were 2,999,524, 3,093,290 and 2,237,921, respectively (Supplementary Table S9). The levels of genome-wide genetic diversity were almost twice as high in the eastern Himalayas ( $5.19 \times 10^{-3}$ ) and Central/East China groups ( $5.30 \times 10^{-3}$ ) as in the Mongolian group ( $3.15 \times 10^{-3}$ ).

## Supplementary Note 2. Description of genes relevance to hypoxia adaptation

Previous studies of genome scans in organisms on the Tibetan plateau and other high altitudinal environments have independently identified genes that participate in these pathways, e.g., *PI3KCG* and *PRAAA1* in Tibetans and Andeans [1-2] and *ITGA2* in Tibetan pig [3]. Furthermore, hypoxia-induced experiments in laboratory cells and mice also provided evidence for hypoxia response of other genes (Table 1). *EP300* is critical co-activator of the HIF-1 pathway [4-7]. A blockage of the interaction of *EP300* with HIF-1 $\alpha$  attenuates hypoxia-inducible transcription in cell culture [7]. *ITGA6* activates HIF-1 $\alpha$  under the hypoxia condition and regulates VEGF transcription [8]. *PI3KCG* and *CREB1* in PI3K-akt pathway are important regulators of HIF-1 $\alpha$  expression, HIF-1 activation and VEGF expression during prolonged hypoxia [9-10]. *MAPK1* activates HIF-1 by promoting the phosphorylation of *HIF-1 $\alpha$*  and its accumulation in response to advanced glycation end products or mersalyl [11-12]. *VWF* is a glycosylated protein expressed exclusively in endothelial cells and hypoxia significantly increases *VWF* expression in heart, lung and liver [13].

Positively selected genes in the calcium signaling pathway were also detected in high altitudinal great tits. Calcium transporters are very sensitively to oxygen deficiency. One of the constant early responses to hypoxia in almost all cell types is to increase intracellular Ca<sup>2+</sup> ([Ca<sup>2+</sup>]<sub>i</sub>). *ITPR2* and *PLCD4* in calcium pathway provide a link to the hypoxia-activated mechanism of ([Ca<sup>2+</sup>]<sub>i</sub>) increase and releases of Ca<sup>2+</sup> from intracellular Ca<sup>2+</sup> stores [14]. These changes are mediated with increased activity of Ca<sup>2+</sup> ATPase and increased number of IP<sub>3</sub> receptors (*IP3R*) on nuclear envelope and membranes of endoplasmic reticulum [15].

Additionally, we also detected other genes related to hypoxia response but not involved directly in the pathways mentioned above, for example *ALOX5*, which catalyzes the first step in leukotriene biosynthesis and plays a role in inflammatory processes. A suppression of *ALOX5* activity reduces the cell proliferation and induces intrinsic mitochondrial apoptotic pathway [16].

### References:

1. Bigham, A. *et al.* Identifying signatures of natural selection in Tibetan and Andean populations using dense genome scan data. *PloS Genetics* 6, e1001116 (2010).
2. Zhao, R., Feng, J. & He, G. MiR-613 regulates cholesterol efflux by targeting LXR alpha and ABCA1 in PPAR gamma activated THP-1 macrophages. *Biochemical and biophysical research communications* 448, 329–334 (2014).
3. Ai, H., Yang, B., Li, J., Xie, X., Chen, H. & Ren, J. Population history and genomic signatures for high-altitude adaptation in Tibetan pigs. *BMC genomics* 15, 834 (2014).
4. Arany, Z. *et al.* An essential role for p300/CBP in the cellular response to hypoxia. *Proc. Natl. Acad. Sci. USA* 93, 12969–12973 (1996).
5. Carrero, P., Okamoto, K., Coumailleau, P., O'Brien, S., Tanaka, H. & Poellinger, L. Redox-regulated recruitment of the transcriptional co-activators CREB-binding protein and SRC-1 to hypoxia-inducible factor 1 $\alpha$ . *Mol. Cell Biol.* 20, 402–415 (2000).

6. Ema, M. *et al.* Molecular mechanisms of transcription activation by HIF and HIF1 $\alpha$  in response to hypoxia: their stabilization and redox signal-induced interaction with CBP/p300. *EMBO. J.* 18, 1905–1914 (1999).
7. Kung, A.L. *et al.* Small molecule blockade of transcriptional coactivation of the hypoxia-inducible factor pathway. *Cancer Cell* 6, 33–43 (2004).
8. Chuang, J., Yoon, S., Datta, K., Bachelder, R.E. & Mercurio, A.M. Hypoxia-induced vascular endothelial growth factor transcription and protection from apoptosis are dependent on  $\alpha$ -6- $\beta$ -1 integrin in breast carcinoma cells. *Cancer Res.* 64, 4711–4716 (2004).
9. Nakayama, K. cAMP-response element-binding protein (CREB) and NR-KB transcription factors are activated during prolonged hypoxia and cooperatively regulate the induction of matrix metalloproteinase MMP1. *J. Bio. Chem.* 288, 22584–22595 (2013).
10. Stiehl, D.P., Wirthner, R., Köditz, J., Spielmann, P., Camenisch, G. & Wenger, R.H. Increased prolyl 4-hydroxylase domain proteins compensate for decreased oxygen levels. Evidence for an autoregulatory oxygen-sensing system. *J. Biol. Chem.* 281, 23482–23491 (2006).
11. Minet, E. *et al.* ERK activation upon hypoxia: involvement in HIF-1 activation. *FEBS Letter* 468, 53–58 (2000).
12. Treins, C., Giorgetti-Peraldi, S., Murdaca, J., Semenza, G.L. & Obberghen, E.V. Insulin stimulates hypoxia-inducible factor 1 through a phosphatidylinositol 3-Kinase/Target of Rapamycin-dependent signaling pathway. *Journal of Biological Chemistry* 277, 27975–27981 (2002).
13. Mojiri, A. *et al.* Hypoxia results in upregulation and De novo activation of von willebrand factor expression in lung endothelial cells. *Vascular Biology* 33, 1329–1338 (2013).
14. Toescu, E.C., Verkhatsky, A. & Landfield, P.W. Ca<sup>2+</sup> regulation and gene expression in normal brain aging. *Trends Neurosci.* 27, 614–620 (2004).
15. Jurkovicova, D. *et al.* Hypoxia differently modulates gene expression of Inositol 1, 4, 5-Trisphosphate receptors in Mouse kidney and HEK 293 cell line. *Annals of the New York Academy of Sciences* 1148, 421–427 (2008).
16. Bishayee, K. & Khuda-Bukhsh, A.R. 5-lipoxygenase antagonist therapy: a new approach towards targeted cancer chemotherapy. *Acta. Biochim. Biophys. Sin.* 45, 709–719 (2013).

Supplementary Table S1. Pairwise  $F_{ST}$  between the three great tit groups.

|                    | Mongolia | Eastern Himalayas | Central/East China |
|--------------------|----------|-------------------|--------------------|
| Mongolia           |          |                   |                    |
| Eastern Himalayas  | 0.5028   |                   |                    |
| Central/East China | 0.4357   | 0.2335            |                    |

Supplementary Table S2. 183 genes showed signal of positive selection in the eastern Himalayas great tits.

| Genes                      | SWISS    |
|----------------------------|----------|
| Evm.model.scaffold15230.48 | WNT8B    |
| Evm.model.scaffold16291.37 | WNT6     |
| Evm.model.scaffold16291.38 | WNT10A   |
| Evm.model.scaffold21931.16 | WIF1     |
| Evm.model.scaffold22289.5  | VWF      |
| Evm.model.scaffold15230.11 | VCL      |
| Evm.model.scaffold23087.6  | UTP15    |
| Evm.model.scaffold17397.19 | UGDH     |
| Evm.model.scaffold23041.2  | UGCG     |
| Evm.model.scaffold20308.11 | UBE2N    |
| Evm.model.scaffold22308.1  | TYRP1    |
| Evm.model.scaffold1821.9   | TUBA4A   |
| Evm.model.scaffold23068.33 | TOP3B    |
| Evm.model.scaffold21641.14 | THBS4    |
| Evm.model.scaffold23044.18 | TH       |
| Evm.model.scaffold19776.37 | TGFB3    |
| Evm.model.scaffold1821.8   | TBA5     |
| Evm.model.scaffold22671.18 | SUV420H1 |
| Evm.model.scaffold17474.9  | SRP54    |
| Evm.model.scaffold22997.4  | SPTLC1   |
| Evm.model.scaffold13364.18 | SOCS1    |
| Evm.model.scaffold12377.16 | SNX29    |
| Evm.model.scaffold10071.19 | SNW1     |
| Evm.model.scaffold12228.27 | SMS      |
| Evm.model.scaffold16291.25 | SLC11A1  |
| Evm.model.scaffold21181.7  | SHC3     |
| Evm.model.scaffold22820.2  | SH3GL2   |
| Evm.model.scaffold15230.47 | SEC31B   |
| Evm.model.scaffold21181.8  | S1PR3    |
| Evm.model.scaffold16291.29 | RQCD1    |
| Evm.model.scaffold3693.14  | RPS6KA5  |
| Evm.model.scaffold12228.21 | RPS6KA3  |
| Evm.model.scaffold19805.5  | RPS6     |
| Evm.model.scaffold21284.27 | RPL5     |
| Evm.model.scaffold17475.4  | RPL37    |
| Evm.model.scaffold13364.19 | RMI2     |
| Evm.model.scaffold23040.6  | RHOA     |
| Evm.model.scaffold23034.11 | RFK      |
| Evm.model.scaffold2701.61  | RBX1     |
| Evm.model.scaffold21898.7  | RBPJ     |
| Evm.model.scaffold1954.1   | RAD51B   |
| Evm.model.scaffold16315.4  | PTPRB    |
| Evm.model.scaffold21896.26 | PTPN5    |
| Evm.model.scaffold1821.28  | PSMD14   |
| Evm.model.scaffold12566.49 | PSMC3    |
| Evm.model.scaffold22850.2  | PSD3     |
| Evm.model.scaffold15230.40 | PSD      |
| Evm.model.scaffold8566.11  | PRKCE    |
| Evm.model.scaffold8566.12  | UNKNOWN  |
| Evm.model.scaffold22742.12 | PRKAR2A  |
| Evm.model.scaffold16291.35 | PRKAG3   |
| Evm.model.scaffold17475.5  | PRKAA1   |
| Evm.model.scaffold15230.22 | PPP3CB   |



---

|                            |          |
|----------------------------|----------|
| Evm.model.scaffold21898.17 | PPARGC1A |
| Evm.model.scaffold22269.35 | POLR2F   |
| Evm.model.scaffold22637.2  | PLK2     |
| Evm.model.scaffold16291.30 | PLCD4    |
| Evm.model.scaffold22269.30 | PLA2G6   |
| Evm.model.scaffold23034.9  | PIP5K1B  |
| Evm.model.scaffold14622.13 | PIP4K2A  |
| Evm.model.scaffold4277.3   | PIK3CG   |
| Evm.model.scaffold1954.4   | PIGH     |
| Evm.model.scaffold23000.1  | PIGG     |
| Evm.model.scaffold23063.7  | PELO     |
| Evm.model.scaffold23000.4  | PDE6B    |
| Evm.model.scaffold12020.3  | PAIP1    |
| Evm.model.scaffold22026.2  | OXCT1    |
| Evm.model.scaffold22087.33 | OGG1     |
| Evm.model.scaffold22930.1  | NTRK2    |
| Evm.model.scaffold22936.2  | UNKNOWN  |
| Evm.model.scaffold22289.7  | NTF3     |
| Evm.model.scaffold10071.16 | NRX3A    |
| Evm.model.scaffold3737.6   | NRG1     |
| Evm.model.scaffold12020.2  | NNT      |
| Evm.model.scaffold23067.4  | NLN      |
| Evm.model.scaffold15230.39 | NFKB2    |
| Evm.model.scaffold15230.46 | NDUFB8   |
| Evm.model.scaffold19995.5  | NCBP1    |
| Evm.model.scaffold17157.5  | NANS     |
| Evm.model.scaffold15335.13 | NAMPT    |
| Evm.model.scaffold22700.4  | NAA38    |
| Evm.model.scaffold22654.35 | MUTYH    |
| Evm.model.scaffold23044.15 | MRPL23   |
| Evm.model.scaffold23063.4  | MOCS2    |
| Evm.model.scaffold23016.53 | MLTK     |
| Evm.model.scaffold19776.26 | MLH3     |
| Evm.model.scaffold23068.31 | MAPK1    |
| Evm.model.scaffold23016.26 | LRP2     |
| Evm.model.scaffold22850.1  | LPL      |
| Evm.model.scaffold23089.1  | LPAR1-A  |
| Evm.model.scaffold17157.1  | LNPEP    |
| Evm.model.scaffold17397.18 | LIAS     |
| Evm.model.scaffold17991.20 | LGMN     |
| Evm.model.scaffold4763.20  | LAMB4    |
| Evm.model.scaffold4763.21  | LAMB1    |
| Evm.model.scaffold21842.6  | KCNMA1   |
| Evm.model.scaffold21953.12 | ITPR2    |
| Evm.model.scaffold23016.48 | ITGA6    |
| Evm.model.scaffold23063.5  | ITGA2    |
| Evm.model.scaffold23063.6  | ITGA1    |
| Evm.model.scaffold20994.8  | IQGAP1   |
| Evm.model.scaffold23044.17 | INS      |
| Evm.model.scaffold22064.11 | INHBB    |
| Evm.model.scaffold21152.1  | IL6ST    |
| Evm.model.scaffold21641.10 | HOMER1   |
| Evm.model.scaffold23087.10 | HEXB     |
| Evm.model.scaffold22010.3  | GZMA     |
| Evm.model.scaffold12377.15 | GSPT2    |
| Evm.model.scaffold23040.8  | GRM2     |
| Evm.model.scaffold17157.7  | GNE      |

---

---

|                            |          |
|----------------------------|----------|
| Evm.model.scaffold23034.16 | GNAQ     |
| Evm.model.scaffold23087.14 | GCNT4    |
| Evm.model.scaffold21079.19 | GCLC     |
| Evm.model.scaffold15230.37 | GBF1     |
| Evm.model.scaffold21243.18 | GAS1     |
| Evm.model.scaffold21181.1  | GADD45G  |
| Evm.model.scaffold2983.2   | GAB1     |
| Evm.model.scaffold23042.19 | FZD7     |
| Evm.model.scaffold23042.28 | FZD5     |
| Evm.model.scaffold23063.1  | FST      |
| Evm.model.scaffold19000.1  | FREM1    |
| Evm.model.scaffold3737.3   | FNTA     |
| Evm.model.scaffold20849.1  | FGF10    |
| Evm.model.scaffold19776.22 | FCF1     |
| Evm.model.scaffold23040.3  | FANCD2   |
| Evm.model.scaffold20994.6  | F2RL1    |
| Evm.model.scaffold20994.7  | F2R      |
| Evm.model.scaffold2701.60  | EP300    |
| Evm.model.scaffold21079.20 | ELOVL5   |
| Evm.model.scaffold19776.25 | EIF2B2   |
| Evm.model.scaffold14622.9  | DNAJC1   |
| Evm.model.scaffold1821.10  | DNAJB2   |
| Evm.model.scaffold19995.10 | DNAJA1   |
| Evm.model.scaffold23090.1  | DNAI1    |
| Evm.model.scaffold21641.7  | DMGDH    |
| Evm.model.scaffold12566.14 | DLL4     |
| Evm.model.scaffold22860.2  | DDX58    |
| Evm.model.scaffold17475.7  | DAB2     |
| Evm.model.scaffold16291.36 | CYP27A1  |
| Evm.model.scaffold298.3    | CYB5R3   |
| Evm.model.scaffold21243.16 | CTSL1    |
| Evm.model.scaffold12566.28 | CREB3L1  |
| Evm.model.scaffold23042.31 | CREB1    |
| Evm.model.scaffold23004.9  | CNG3     |
| Evm.model.scaffold17157.6  | CLTA     |
| Evm.model.scaffold18237.4  | CHSY3    |
| Evm.model.scaffold23000.8  | CHRN3    |
| Evm.model.scaffold20628.4  | CHRNA7   |
| Evm.model.scaffold23000.7  | CHRNA6   |
| Evm.model.scaffold22671.19 | CHKA     |
| Evm.model.scaffold22717.2  | CDKN1B   |
| Evm.model.scaffold18267.7  | CD274    |
| Evm.model.scaffold21898.6  | CCKAR    |
| Evm.model.scaffold15230.13 | CAMK2G   |
| Evm.model.scaffold21641.8  | BHMT     |
| Evm.model.scaffold19995.7  | B4GALT1  |
| Evm.model.scaffold14602.10 | ATP6V1G3 |
| Evm.model.scaffold21641.6  | ARSB     |
| Evm.model.scaffold9906.14  | AP4S1    |
| Evm.model.scaffold15230.10 | AP3M1    |
| Evm.model.scaffold15230.53 | ALOX5    |
| Evm.model.scaffold21284.53 | AGL      |
| Evm.model.scaffold13692.5  | ACTN1    |
| Evm.model.scaffold12228.22 | ACPI     |
| Evm.model.scaffold22875.10 | UNKNOWN  |
| Evm.model.scaffold15230.49 | ACOD     |
| Evm.model.scaffold22860.1  | ACO1     |

---

---

|                            |         |
|----------------------------|---------|
| Evm.model.scaffold19805.6  | ACER2   |
| Evm.model.scaffold21754.59 | ACADS   |
| Evm.model.scaffold14488.20 | ABI2    |
| Evm.model.scaffold15230.51 | ABCG2   |
| Evm.model.scaffold21284.41 | ABCD3   |
| Evm.model.scaffold23016.24 | ABCB11  |
| Evm.model.scaffold21284.39 | ABCA4   |
| Evm.model.scaffold22850.4  | ABCA1   |
| Evm.model.scaffold22875.12 | UNKNOWN |
| Evm.model.scaffold15230.9  | UNKNOWN |
| Evm.model.scaffold3693.15  | UNKNOWN |
| Evm.model.scaffold19995.1  | UNKNOWN |
| Evm.model.scaffold12001.1  | UNKNOWN |
| Evm.model.scaffold20994.9  | UNKNOWN |
| Evm.model.scaffold23077.2  | UNKNOWN |
| Evm.model.scaffold15230.24 | UNKNOWN |

---

Supplementary Table S3. Functional gene categories enriched for the high altitude (the eastern Himalayas) great tits compared to lowland (Central/East China and Mongolia) great tits. Only top 10 % categories are given below.

| GO ID                     | Description                                               | Number of genes | P-value              |
|---------------------------|-----------------------------------------------------------|-----------------|----------------------|
| <b>Biological process</b> |                                                           |                 |                      |
| GO:0071840                | Cellular component organization or biogenesis             | 23              | 6.474 E-03           |
| GO:0007596                | Blood coagulation                                         | 3               | 6.528 E-03           |
| GO:0007599                | Hemostasis                                                | 3               | 6.528 E-03           |
| GO:0050878                | Regulation of body fluid levels                           | 3               | 6.528 E-03           |
| GO:0016043                | Cellular component organization                           | 21              | 7.088 E-03           |
| GO:0050817                | Coagulation                                               | 3               | 8.922 E-03           |
| GO:0042060                | Wound healing                                             | 3               | 1.062 E-02           |
| GO:0051276                | Chromosome organization                                   | 8               | 1.164 E-02           |
| GO:0016568                | Chromatin modification                                    | 4               | 1.312 E-02           |
| GO:0071704                | Organic substance metabolic process                       | 176             | 1.538 E-02           |
| GO:0043170                | Macromolecule metabolic process                           | 137             | 1.728 E-02           |
| GO:0006325                | Chromatin organization                                    | 7               | 1.738 E-02           |
| GO:0008152                | Metabolic process                                         | 202             | 2.135 E-02           |
| GO:0044260                | Cellular macromolecule metabolic process                  | 120             | 2.153 E-02           |
| GO:0044238                | Primary metabolic process                                 | 171             | 2.176 E-02           |
| <b>Molecular function</b> |                                                           |                 |                      |
| GO:0019887                | Protein kinase regulator activity                         | 4               | 6.216E-03            |
| GO:0019207                | Kinase regulator activity                                 | 4               | 1.228E-02            |
| GO:0016705                | Oxidoreductase activity                                   | 10              | 1.257E-02            |
| GO:0004835                | Tubulin-tyrosine ligase activity                          | 3               | 1.4E-02              |
| GO:0004889                | Acetylcholine-activated cation-selective channel activity | 3               | 2.0E-02              |
| GO:0051213                | Dioxygenase activity                                      | 5               | 2.194E-02            |
| GO:0004725                | Protein tyrosine phosphatase activity                     | 6               | 2.43E-02             |
| GO:0031072                | Heat shock protein binding                                | 6               | 2.80E-02<br>2.79E-02 |

Supplementary Table S4. Hypoxia genes showed signatures of selection in high altitude great tit. These genes exhibited a higher  $F_{ST}$ ,  $\Theta\pi$  ratio and Tajima's  $D$  (Tajima's  $D$  lowland – Tajima's  $D$  highland) compared with the genome background.

| Genes          | $F_{ST}$ | $P$ value | $\Theta\pi$ ratio | $P$ value | Tajima's $D$<br>(lowland-highland) | $P$ value |
|----------------|----------|-----------|-------------------|-----------|------------------------------------|-----------|
| <i>EP300</i>   | 0.487    | 1.23E-29  | 3.452             | 3.16E-23  | 1.882                              | 4.63E-21  |
| <i>PIK3CG</i>  | 0.538    | 2.41E-25  | 2.820             | 1.77E-11  | 1.778                              | 2.39E-14  |
| <i>CAMK2G</i>  | 0.523    | 6.78E-59  | 3.373             | 7.73E-09  | 1.088                              | 1.23E-11  |
| <i>MARK1</i>   | 0.407    | 3.76E-15  | 2.210             | 6.90E-08  | 1.164                              | 3.15E-09  |
| <i>NFKB2</i>   | 0.43     | 9.30E-10  | 2.743             | 3.55E-04  | 0.914                              | 1.04E-03  |
| <i>RPS6KA3</i> | 0.526    | 5.40E-25  | 2.8               | 1.24E-14  | 0.548                              | 2.22E-05  |
| <i>PTPN5</i>   | 0.556    | 2.15E-34  | 2.48              | 3.90E-10  | 1.228                              | 6.95E-13  |
| <i>RPS6KA5</i> | 0.575    | 2.93E-22  | 4.375             | 1.34E-12  | 1.386                              | 2.00E-08  |
| <i>CREB1</i>   | 0.600    | 4.79E-11  | 5.6               | 1.08E-04  | 2.561                              | 4.47E-11  |
| <i>F2R</i>     | 0.512    | 4.82E-10  | 2.924             | 2.75E-05  | 0.918                              | 2.41E-25  |
| <i>LAMB4</i>   | 0.379    | 4.68E-23  | 2.078             | 1.77E-19  | 1.335                              | 2.99E-12  |
| <i>LAMB1</i>   | 0.466    | 2.10E-11  | 2.48              | 1.97E-07  | 0.467                              | 5.01E-04  |
| <i>ITGA6</i>   | 0.426    | 3.28E-25  | 2.496             | 8.03E-06  | 1.229                              | 6.03E-06  |
| <i>ITGA2</i>   | 0.463    | 3.65E-46  | 2.47              | 5.50E-10  | 0.523                              | 2.47E-07  |
| <i>PRKAA1</i>  | 0.337    | 1.84E-10  | 1.764             | 1.35E-03  | 0.546                              | 4.71E-08  |
| <i>THBS4</i>   | 0.624    | 3.66E-31  | 2.158             | 5.46E-06  | 0.951                              | 1.56E-16  |
| <i>VWF</i>     | 0.509    | 8.40E-62  | 2.017             | 3.60E-12  | 1.253                              | 2.59E-28  |
| <i>CHRNA7</i>  | 0.469    | 2.67E-25  | 2.179             | 4.06E-06  | 1.524                              | 1.28E-21  |
| <i>ITPR2</i>   | 0.459    | 3.52E-99  | 1.664             | 6.27E-11  | 0.777                              | 8.61E-29  |
| <i>ALOX5</i>   | 0.425    | 2.71E-20  | 1.869             | 8.35E-07  | 1.004                              | 4.15E-07  |

Supplementary Table S5. Biometrical measurements of three groups of great tit.

|                      | Body<br>mass<br>(BM) | Body<br>length<br>(BL) | Wing<br>length<br>(WL) | Tail<br>length<br>(TL) | Tarsus<br>length<br>(TL) | Bill<br>length<br>(BL) |
|----------------------|----------------------|------------------------|------------------------|------------------------|--------------------------|------------------------|
| Mongolia             | 18.01±0.7<br>5       | 151.78±3.7<br>0        | 74.02±0.6<br>6         | 68.64±0.7<br>2         | 18.78±0.12               | 9.00±0.1<br>3          |
| Eastern<br>Himalayas | 15.72±0.2<br>8       | 137.11±1.7<br>0        | 73.64±0.5<br>9         | 65.98±0.6<br>5         | 18.15±0.17               | 8.05±0.1<br>7          |
| Central/East         | 13.79±0.1<br>8       | 127.16±1.5<br>4        | 67.81±0.5<br>0         | 61.43±0.6<br>5         | 16.84±0.12               | 7.74±0.1<br>0          |

Supplementary Table S6. Positive selection in fatty-acid metabolism pathways of ground tit (*Parus humilis*). The data in this table are original from Figure 4 in [5].

|                                                           |          |                                                                                                                                                                                                                                                                                                                                                                            |
|-----------------------------------------------------------|----------|----------------------------------------------------------------------------------------------------------------------------------------------------------------------------------------------------------------------------------------------------------------------------------------------------------------------------------------------------------------------------|
| Fatty acid metabolism<br>KEGG map 01212                   | 4 genes  | Aldehyde dehydrogenase (NAD <sup>+</sup> );<br>acyl-CoA oxidase;<br>acetyl-CoA C-acetyltransferase;<br>long-chain acyl-CoA synthetase                                                                                                                                                                                                                                      |
| Biosynthesis of unsaturated fatty acids<br>KEGG map 01040 | 4 genes  | Acyl-CoA oxidase;<br>stearoyl-CoA desaturase;<br>enoyl reductase;<br>3-hydroxy acyl-CoA dehydratase)                                                                                                                                                                                                                                                                       |
| Ether lipid metabolism<br>KEGG map 00565                  | 6 genes  | 1-acyl-sn-glycerol-3-phosphate acyltransferase;<br>alkylglycerophosphoethanolamine<br>phosphodiesterase;<br>alkyldihydroxyacetonephosphate synthase;<br>phospholipase A2;<br>phosphatidate phosphatase;<br>1-alkyl-2-acetyl-glycerophosphocholine esterase                                                                                                                 |
| Glycerolipid metabolism<br>KEGG map 00561                 | 6 genes  | Aldehyde dehydrogenase (NAD <sup>+</sup> );<br>1-acyl-sn-glycerol-3-phosphate acyltransferase;<br>glycerol kinase; diacylglycerol kinase;<br>acylglycerol lipase, phosphatidate phosphatase                                                                                                                                                                                |
| Glycerophospholipid metabolism<br>KEGG map 00564          | 10 genes | Glycerol-3-phosphate dehydrogenase;<br>phospholipase A2;<br>choline O-acetyltransferase;<br>phosphatidate phosphatase;<br>1-acyl-sn-glycerol-3-phosphate acyltransferase;<br>diacylglycerol kinase;<br>phosphatidate cytidylyltransferase;<br>CDP-diacylglycerol--glycerol-3-phosphate 3-<br>phosphatidyltransferase<br>phospholipase A1;<br>phosphatidylserine synthase 1 |

Supplementary Table S7. Sampling information of the great tit individuals used in this study. MON, Mongolian group, EH, the eastern Himalayas group, CE, the Central/East China group.

| Vouch number | Localities                 | Group | Longitude | Latitude | Altitude |
|--------------|----------------------------|-------|-----------|----------|----------|
| 3918         | Yanbian, Sichuan           | EH    | 101.35.57 | 26.28.23 | 2200m    |
| 4000         | Yanbian, Sichuan           | EH    | 98.43.81  | 24.58.51 | 2200m    |
| 5226         | Gaoligong,<br>Yunnan       | EH    | 98.43.81  | 24.58.51 | 2031m    |
| 5236         | Gaoligong,<br>Yunnan       | EH    | 98.43.81  | 24.58.51 | 2031m    |
| 5242         | Gaoligong,<br>Yunnan       | EH    | 98.43.81  | 24.58.51 | 2031m    |
| 5332         | Gaoligong,<br>Yunnan       | EH    | 98.43.81  | 24.58.51 | 2031m    |
| 5333         | Gaoligong,<br>Yunnan       | EH    | 98.43.81  | 24.58.51 | 2031m    |
| 13924        | Lijiang, Yunnan            | EH    | 100.07    | 27.10    | 2300m    |
| 13938        | Lijiang, Yunnan            | EH    | 100.07    | 27.10    | 2300m    |
| 13995        | Lijiang, Yunnan            | EH    | 100.07    | 27.10    | 2300m    |
| 13996        | Lijiang, Yunnan            | EH    | 100.07    | 27.10    | 2300m    |
| 11555        | Eerguna, Inner<br>Mongolia | MON   | 120.33.02 | 51.58.25 | 750m     |
| 11556        | Eerguna, Inner<br>Mongolia | MON   | 120.33.02 | 51.58.25 | 750m     |
| 11557        | Eerguna, Inner<br>Mongolia | MON   | 120.33.02 | 51.58.25 | 750m     |
| 11564        | Eerguna, Inner<br>Mongolia | MON   | 120.33.02 | 51.58.25 | 750m     |
| 15078        | Teshig, Mongolia           | MON   | 102.75.76 | 49.74.17 | 480m     |
| 15081        | Teshig, Mongolia           | MON   | 102.75.76 | 49.74.17 | 480m     |
| 15100        | Tushig, Mongolia           | MON   | 105.00.11 | 50.30.74 | 480m     |
| 15110        | Tushig, Mongolia           | MON   | 105.00.11 | 50.30.74 | 480m     |
| 15111        | Tushig, Mongolia           | MON   | 105.00.11 | 50.30.74 | 480m     |
| 17252        | Altai Region,<br>Russia    | MON   | 85.65.83  | 51.62.87 | 500m     |
| 8204         | Shenlongjia,<br>Hubei      | CE    | 110.92    | 31.88    | 750m     |
| 8236         | Shenlongjia,<br>Hubei      | CE    | 110.92    | 31.88    | 750m     |
| 10076        | Jixi, Anhui                | CE    | 115.54    | 30.20    | 240m     |
| 10635        | Panjin, Liaoning           | CE    | 121.27.38 | 40.39.12 | 186m     |
| 10636        | Panjin, Liaoning           | CE    | 121.27.38 | 40.39.12 | 186m     |
| 10637        | Panjin, Liaoning           | CE    | 121.27.38 | 40.39.12 | 186m     |
| 10732        | Kuandian,<br>Liaoning      | CE    | 124.85.32 | 40.58.66 | 186m     |



---

|       |                       |    |           |          |      |
|-------|-----------------------|----|-----------|----------|------|
| 10860 | Kuandian,<br>Liaoning | CE | 124.85.32 | 40.58.66 | 186m |
| 11929 | Sunan, Gansu          | CE | 102.00.46 | 37.50.23 | 780m |
| 11944 | Sunan, Gansu          | CE | 102.00.46 | 37.50.23 | 780m |
| 12003 | Yongdeng, Gansu       | CE | 102.44.12 | 36.41.08 | 780m |

---

Supplementary Table S8. Statistics of reads mapping and coverage. MON, Mongolian group, EH, the eastern Himalayas group, CE, the Central/East China group.

| Groups | Vouch number | High-quality base (bp) | Mapping rate (%) | Depth (×) | Coverage at least 1 × (%) | Coverage at least 4 × (%) |
|--------|--------------|------------------------|------------------|-----------|---------------------------|---------------------------|
| EH     | 3918         | 5.60E+09               | 82.09            | 3.95      | 90.11                     | 53.93                     |
| EH     | 4000         | 5.77E+09               | 82.46            | 4.1       | 90.39                     | 56.16                     |
| EH     | 5226         | 6.31E+09               | 84.04            | 4.53      | 90.73                     | 61.53                     |
| EH     | 5236         | 6.45E+09               | 83.80            | 4.59      | 91.23                     | 61.25                     |
| EH     | 5242         | 6.79E+09               | 84.07            | 4.86      | 91.21                     | 65.38                     |
| EH     | 5332         | 5.99E+09               | 83.87            | 4.29      | 90.66                     | 57.49                     |
| EH     | 5333         | 5.79E+09               | 81.57            | 4.06      | 90.22                     | 55.56                     |
| EH     | 13924        | 6.00E+09               | 82.18            | 3.89      | 86.70                     | 50.38                     |
| EH     | 13938        | 5.70E+09               | 84.54            | 4.12      | 90.37                     | 56.39                     |
| EH     | 13995        | 5.44E+09               | 81.88            | 3.83      | 89.29                     | 50.74                     |
| EH     | 13996        | 5.19E+09               | 82.17            | 3.67      | 89.39                     | 49.25                     |
| MON    | 11555        | 5.91E+09               | 82.38            | 4.15      | 90.57                     | 56.08                     |
| MON    | 11556        | 6.68E+09               | 78.97            | 4.43      | 90.66                     | 60.11                     |
| MON    | 11557        | 6.23E+09               | 81.48            | 4.29      | 90.48                     | 58.71                     |
| MON    | 11564        | 5.22E+09               | 78.71            | 3.52      | 89.08                     | 45.72                     |
| MON    | 15078        | 5.76E+09               | 82.02            | 3.99      | 90.01                     | 54.42                     |
| MON    | 15081        | 6.64E+09               | 79.21            | 4.42      | 91.00                     | 59.39                     |
| MON    | 15100        | 5.38E+09               | 82.95            | 4.17      | 90.43                     | 57.24                     |
| MON    | 15110        | 5.21E+09               | 80.37            | 3.57      | 89.30                     | 47.06                     |
| MON    | 15111        | 5.31E+09               | 79.12            | 3.57      | 89.27                     | 46.48                     |
| MON    | 17252        | 6.00E+09               | 81.42            | 4.11      | 90.31                     | 56.20                     |
| CE     | 8204         | 5.70E+09               | 82.05            | 3.96      | 89.55                     | 52.51                     |
| CE     | 8236         | 5.59E+09               | 83.88            | 4.00      | 90.23                     | 54.92                     |
| CE     | 10076        | 6.07E+09               | 83.38            | 4.31      | 90.52                     | 58.91                     |
| CE     | 10635        | 6.15E+09               | 81.51            | 4.25      | 90.63                     | 58.08                     |
| CE     | 10636        | 5.47E+09               | 83.02            | 3.85      | 89.86                     | 52.20                     |
| CE     | 10637        | 5.96E+09               | 79.97            | 4.04      | 90.00                     | 53.96                     |
| CE     | 10732        | 5.00E+09               | 80.01            | 3.45      | 88.57                     | 44.81                     |
| CE     | 10860        | 6.00E+09               | 82.18            | 3.89      | 86.70                     | 50.38                     |
| CE     | 11929        | 5.95E+09               | 82.37            | 4.15      | 90.63                     | 56.07                     |
| CE     | 11944        | 5.93E+09               | 82.95            | 4.17      | 90.43                     | 57.24                     |
| CE     | 12003        | 6.00E+09               | 83.49            | 4.05      | 90.44                     | 54.30                     |

Supplementary Table S9. Statistics of SNPs in whole genome of great tits.

|                       | Number<br>of SNPs | $\Theta\pi$<br>( $10^{-3}$ ) | $\Theta W(10^{-3})$ | Non-synonymous<br>SNPs | Synonymous<br>SNPs | Nonsy/Syn |
|-----------------------|-------------------|------------------------------|---------------------|------------------------|--------------------|-----------|
| Mongolia              | 2,237,921         | 3.147                        | 2.509               | 9,313                  | 35,941             | 0.2591    |
| Eastern<br>Himalayas  | 2,999,524         | 5.185                        | 3.971               | 11,728                 | 46,932             | 0.2499    |
| Central/East<br>China | 3,093,290         | 5.302                        | 4.145               | 12,118                 | 48,375             | 0.2505    |

Figure S1

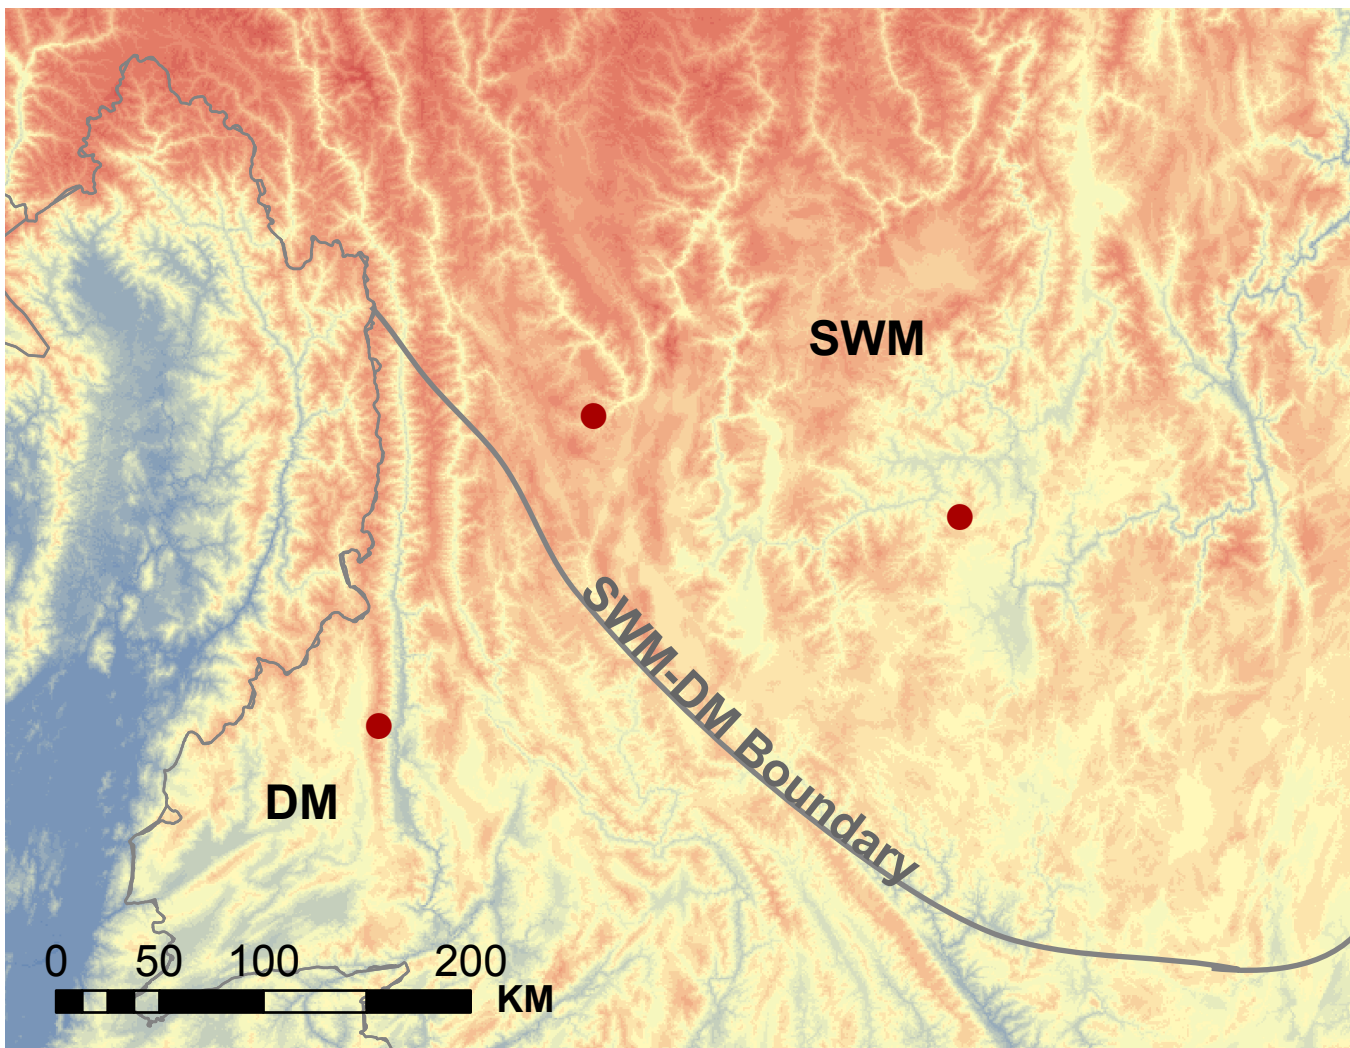

Figure S2

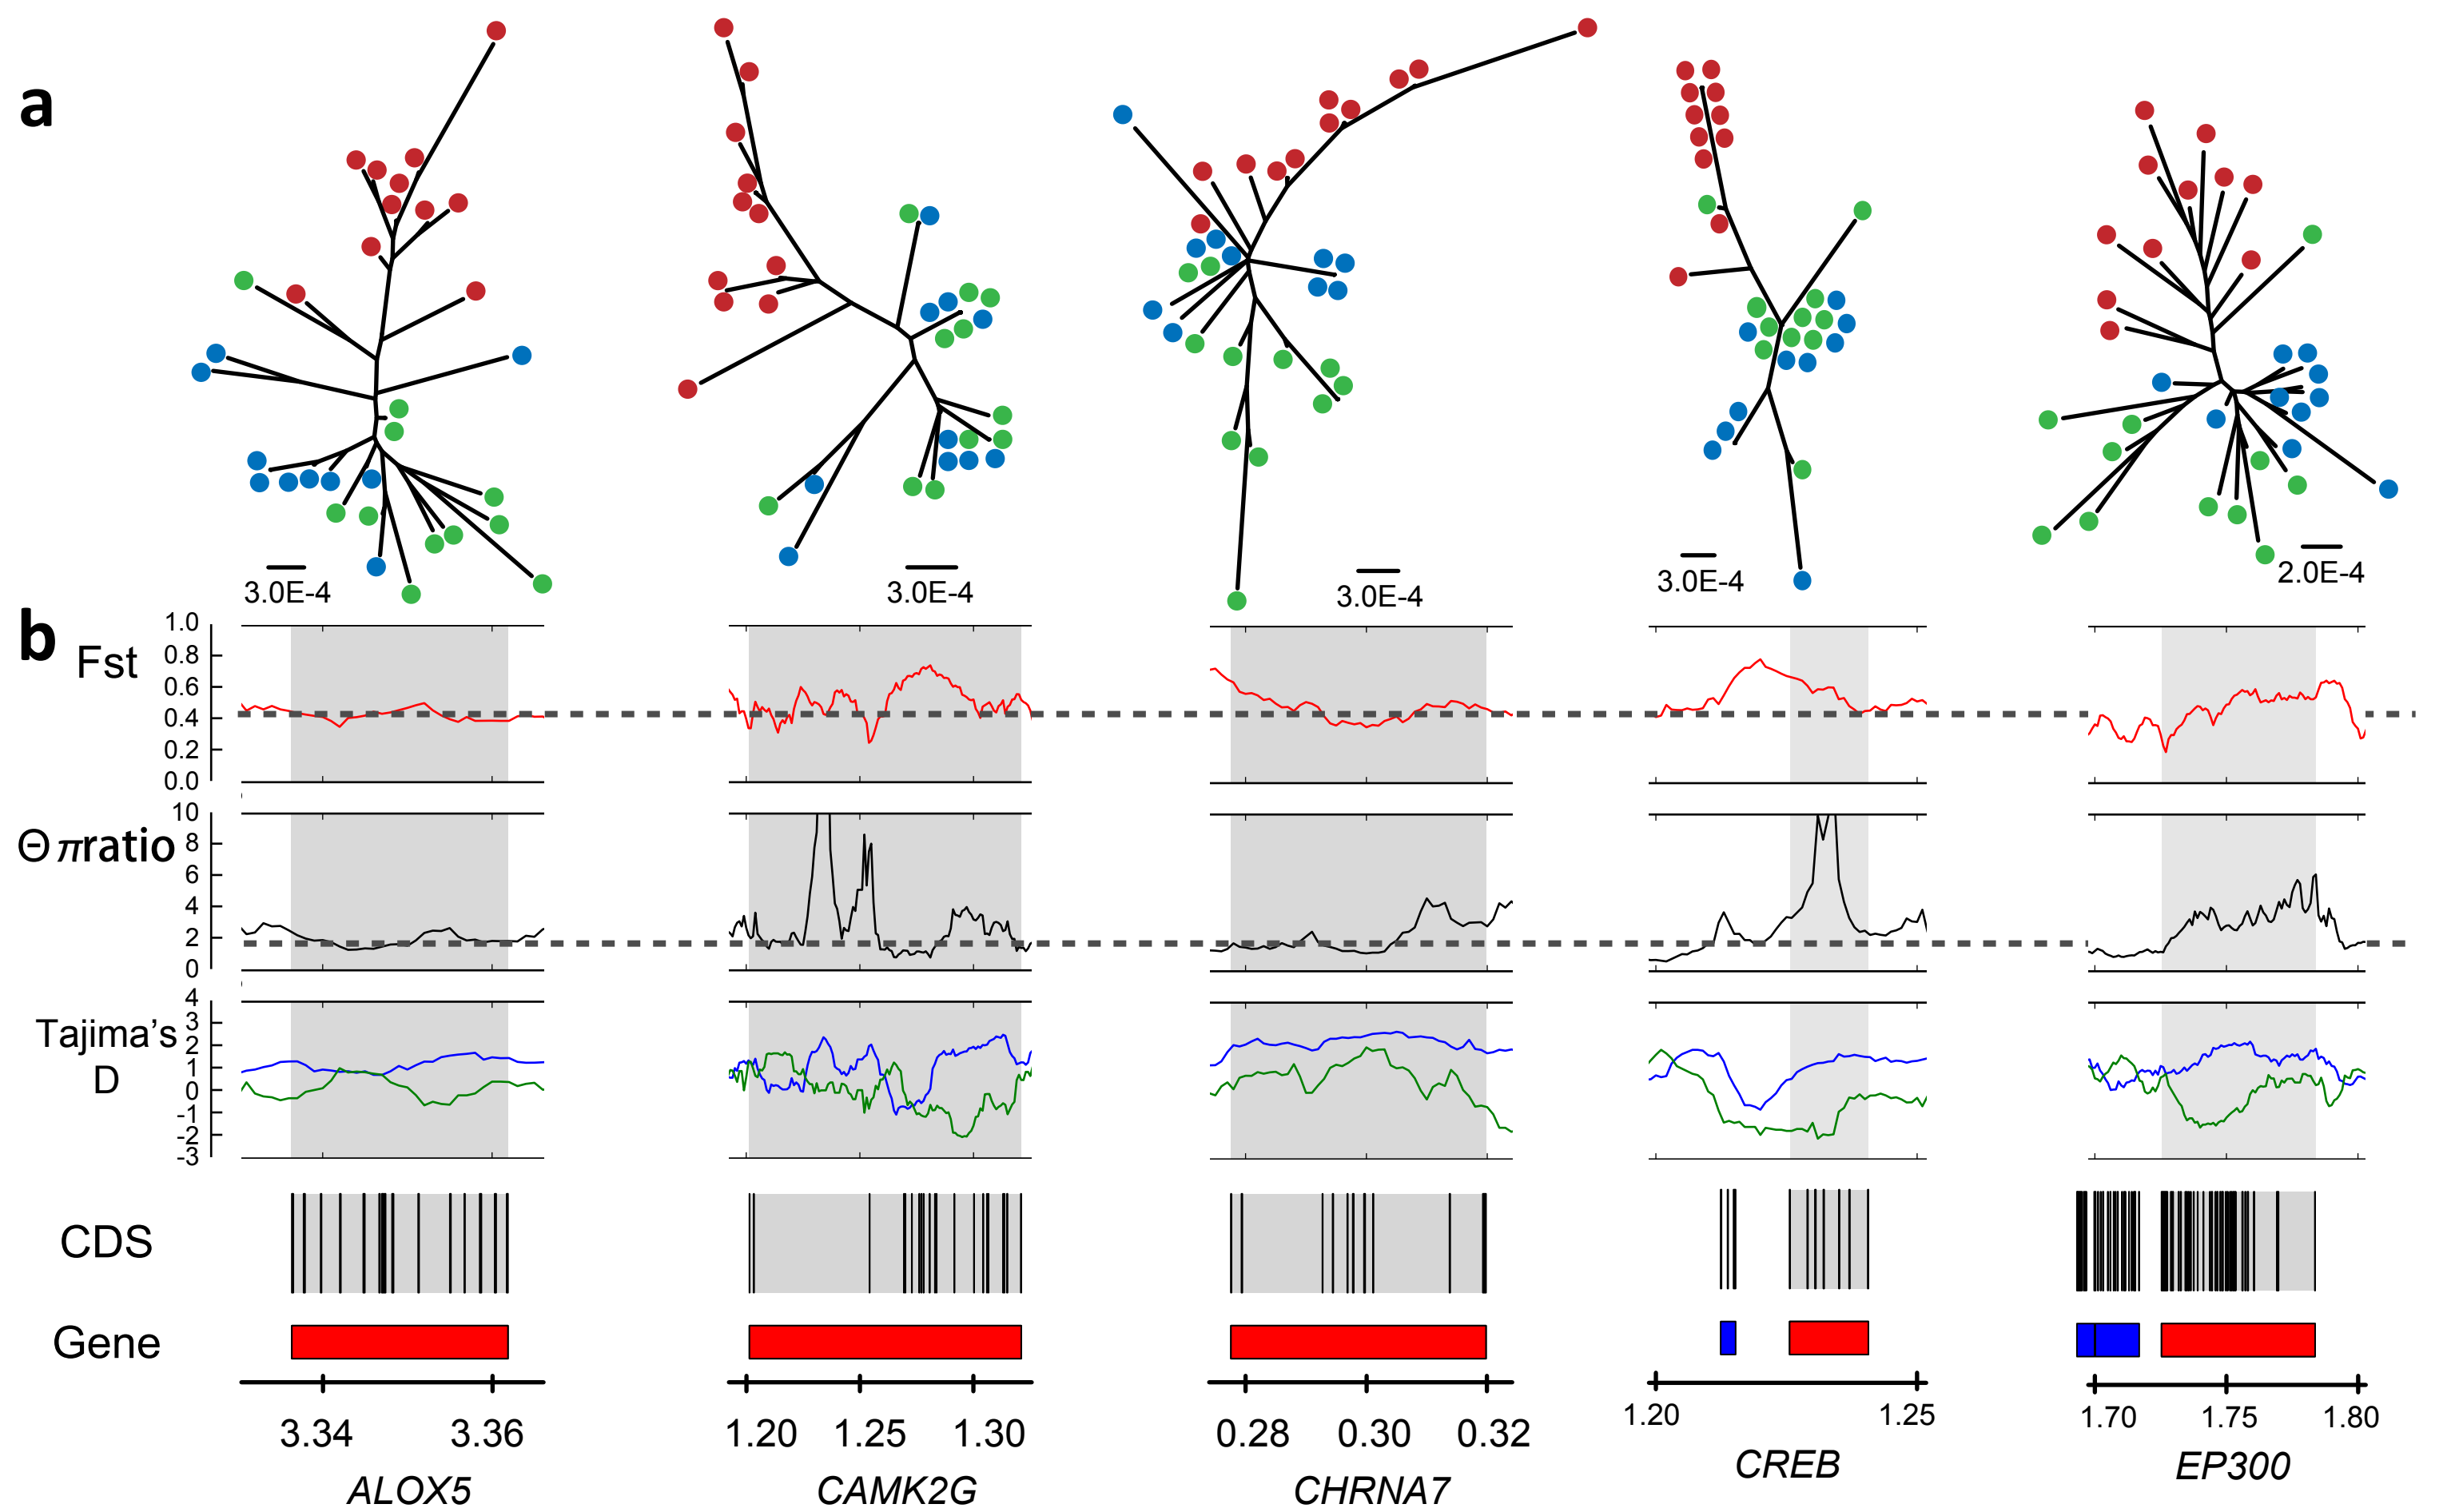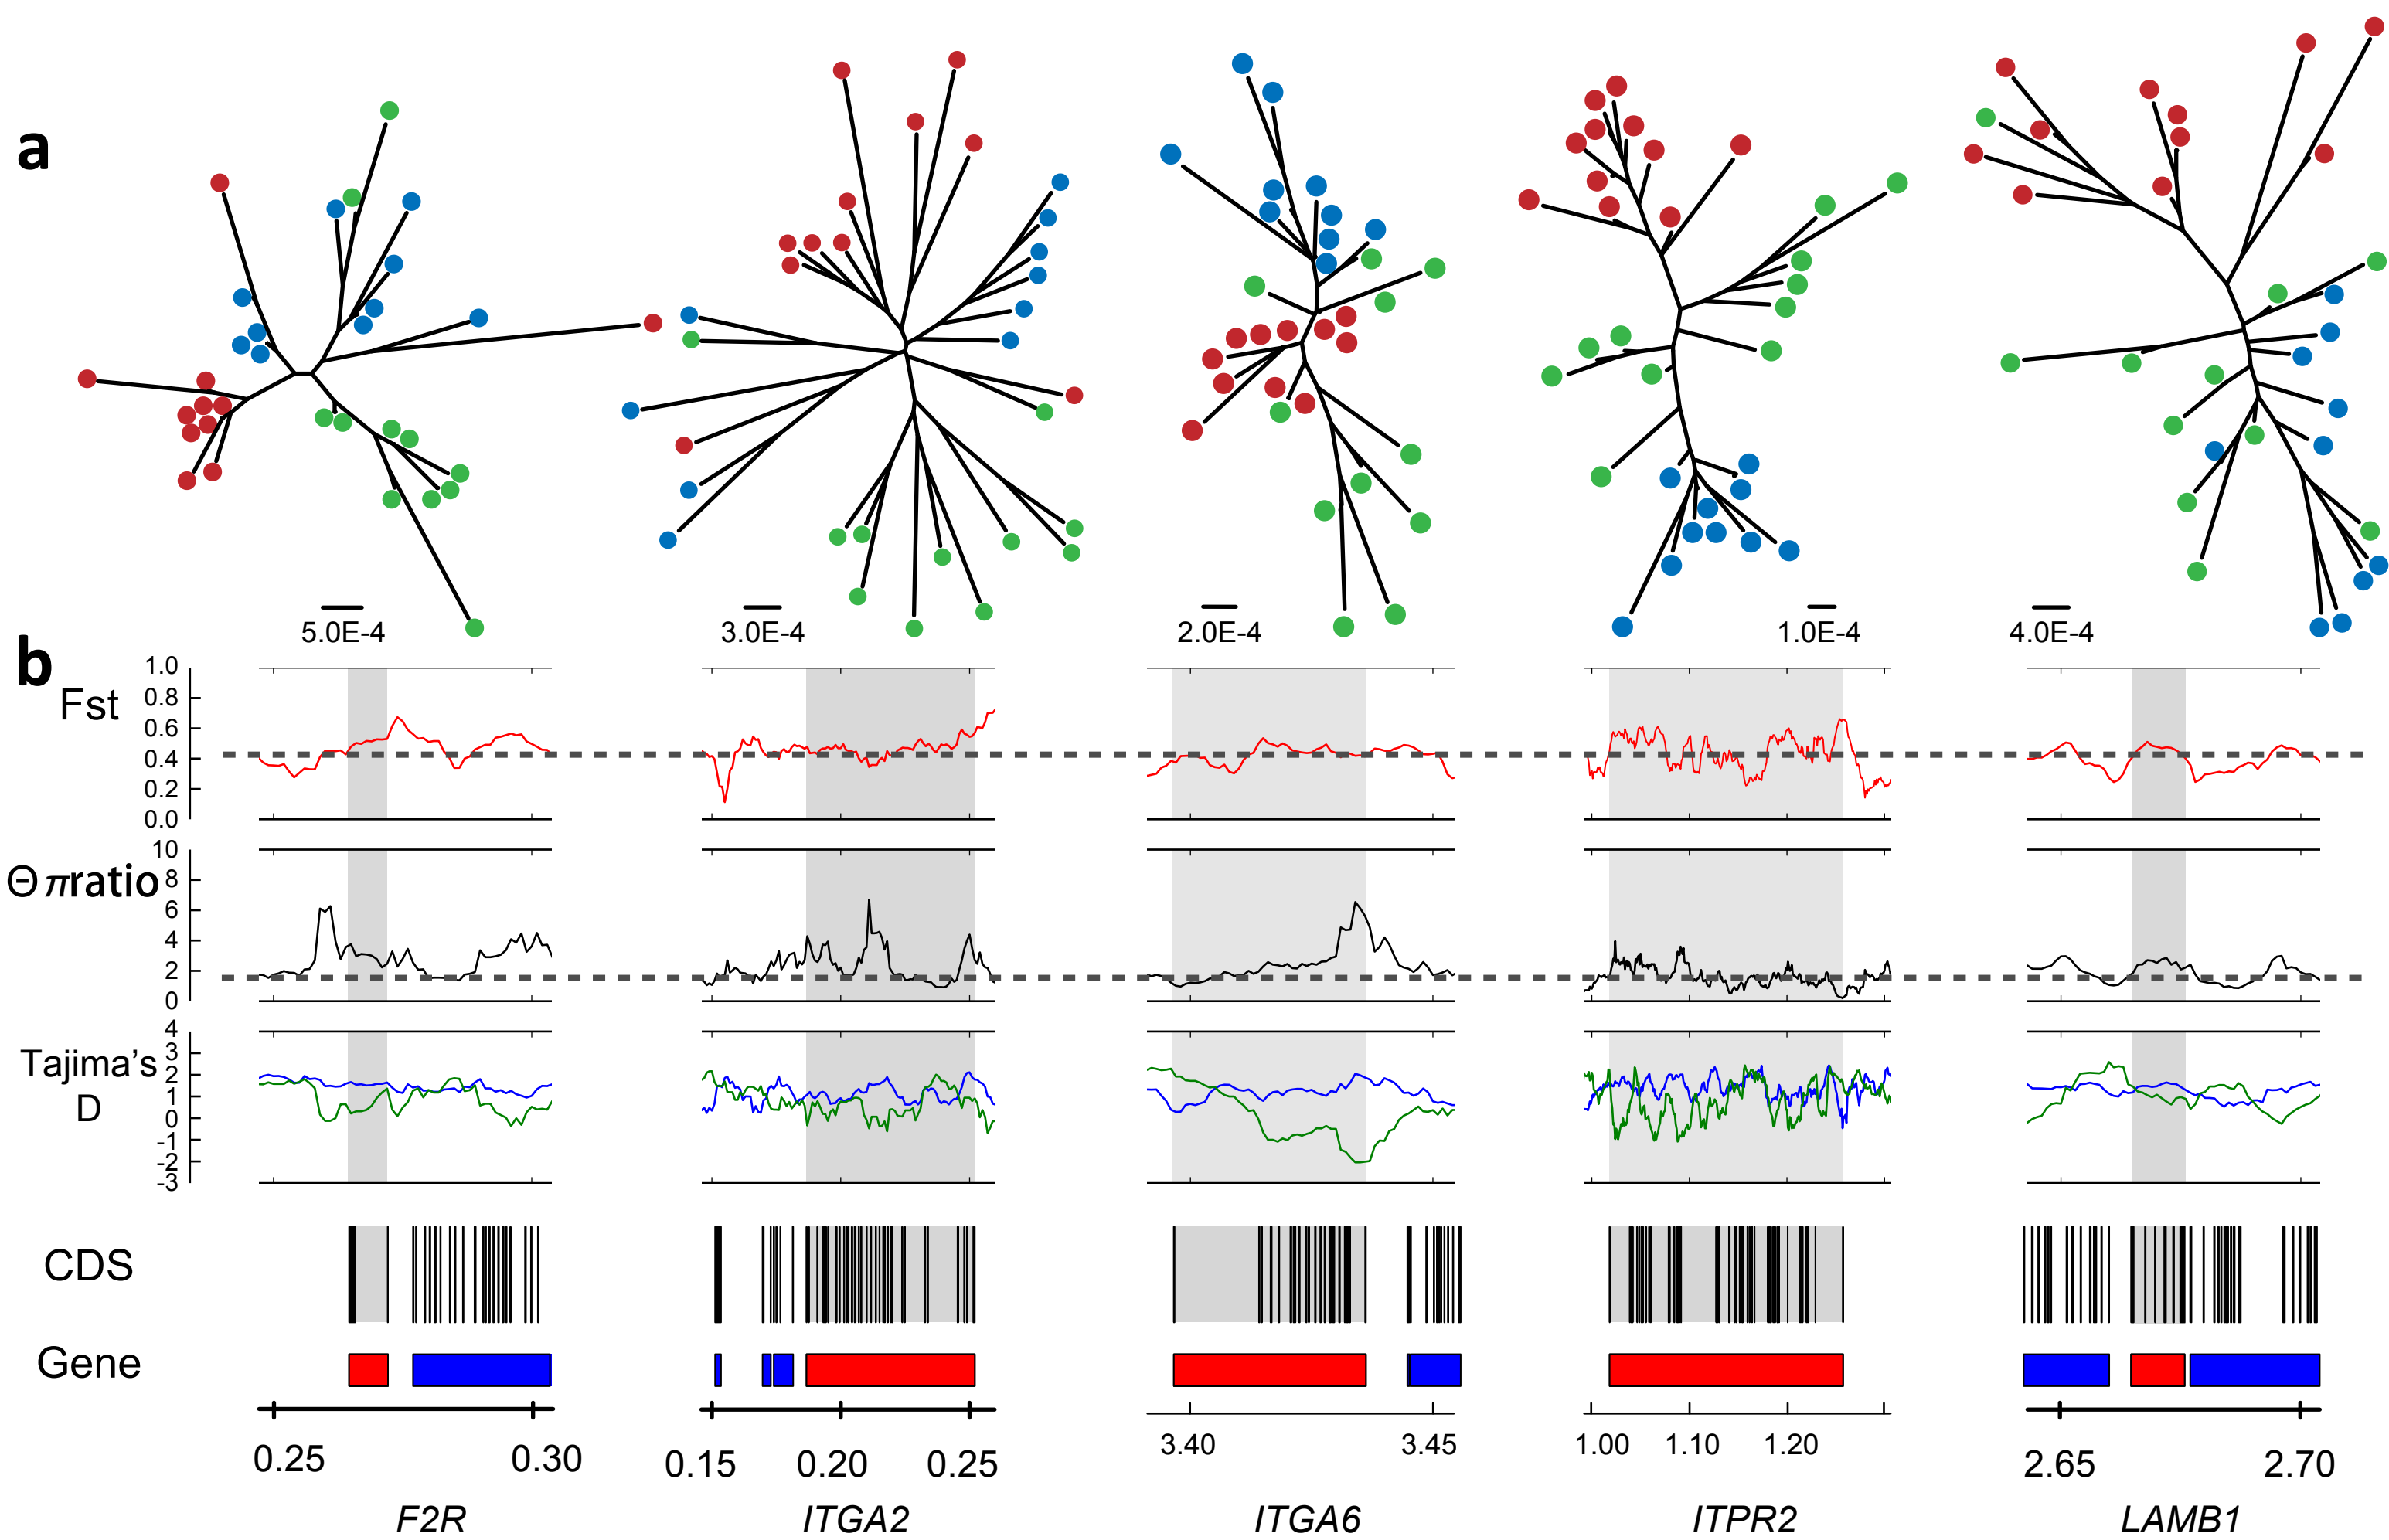

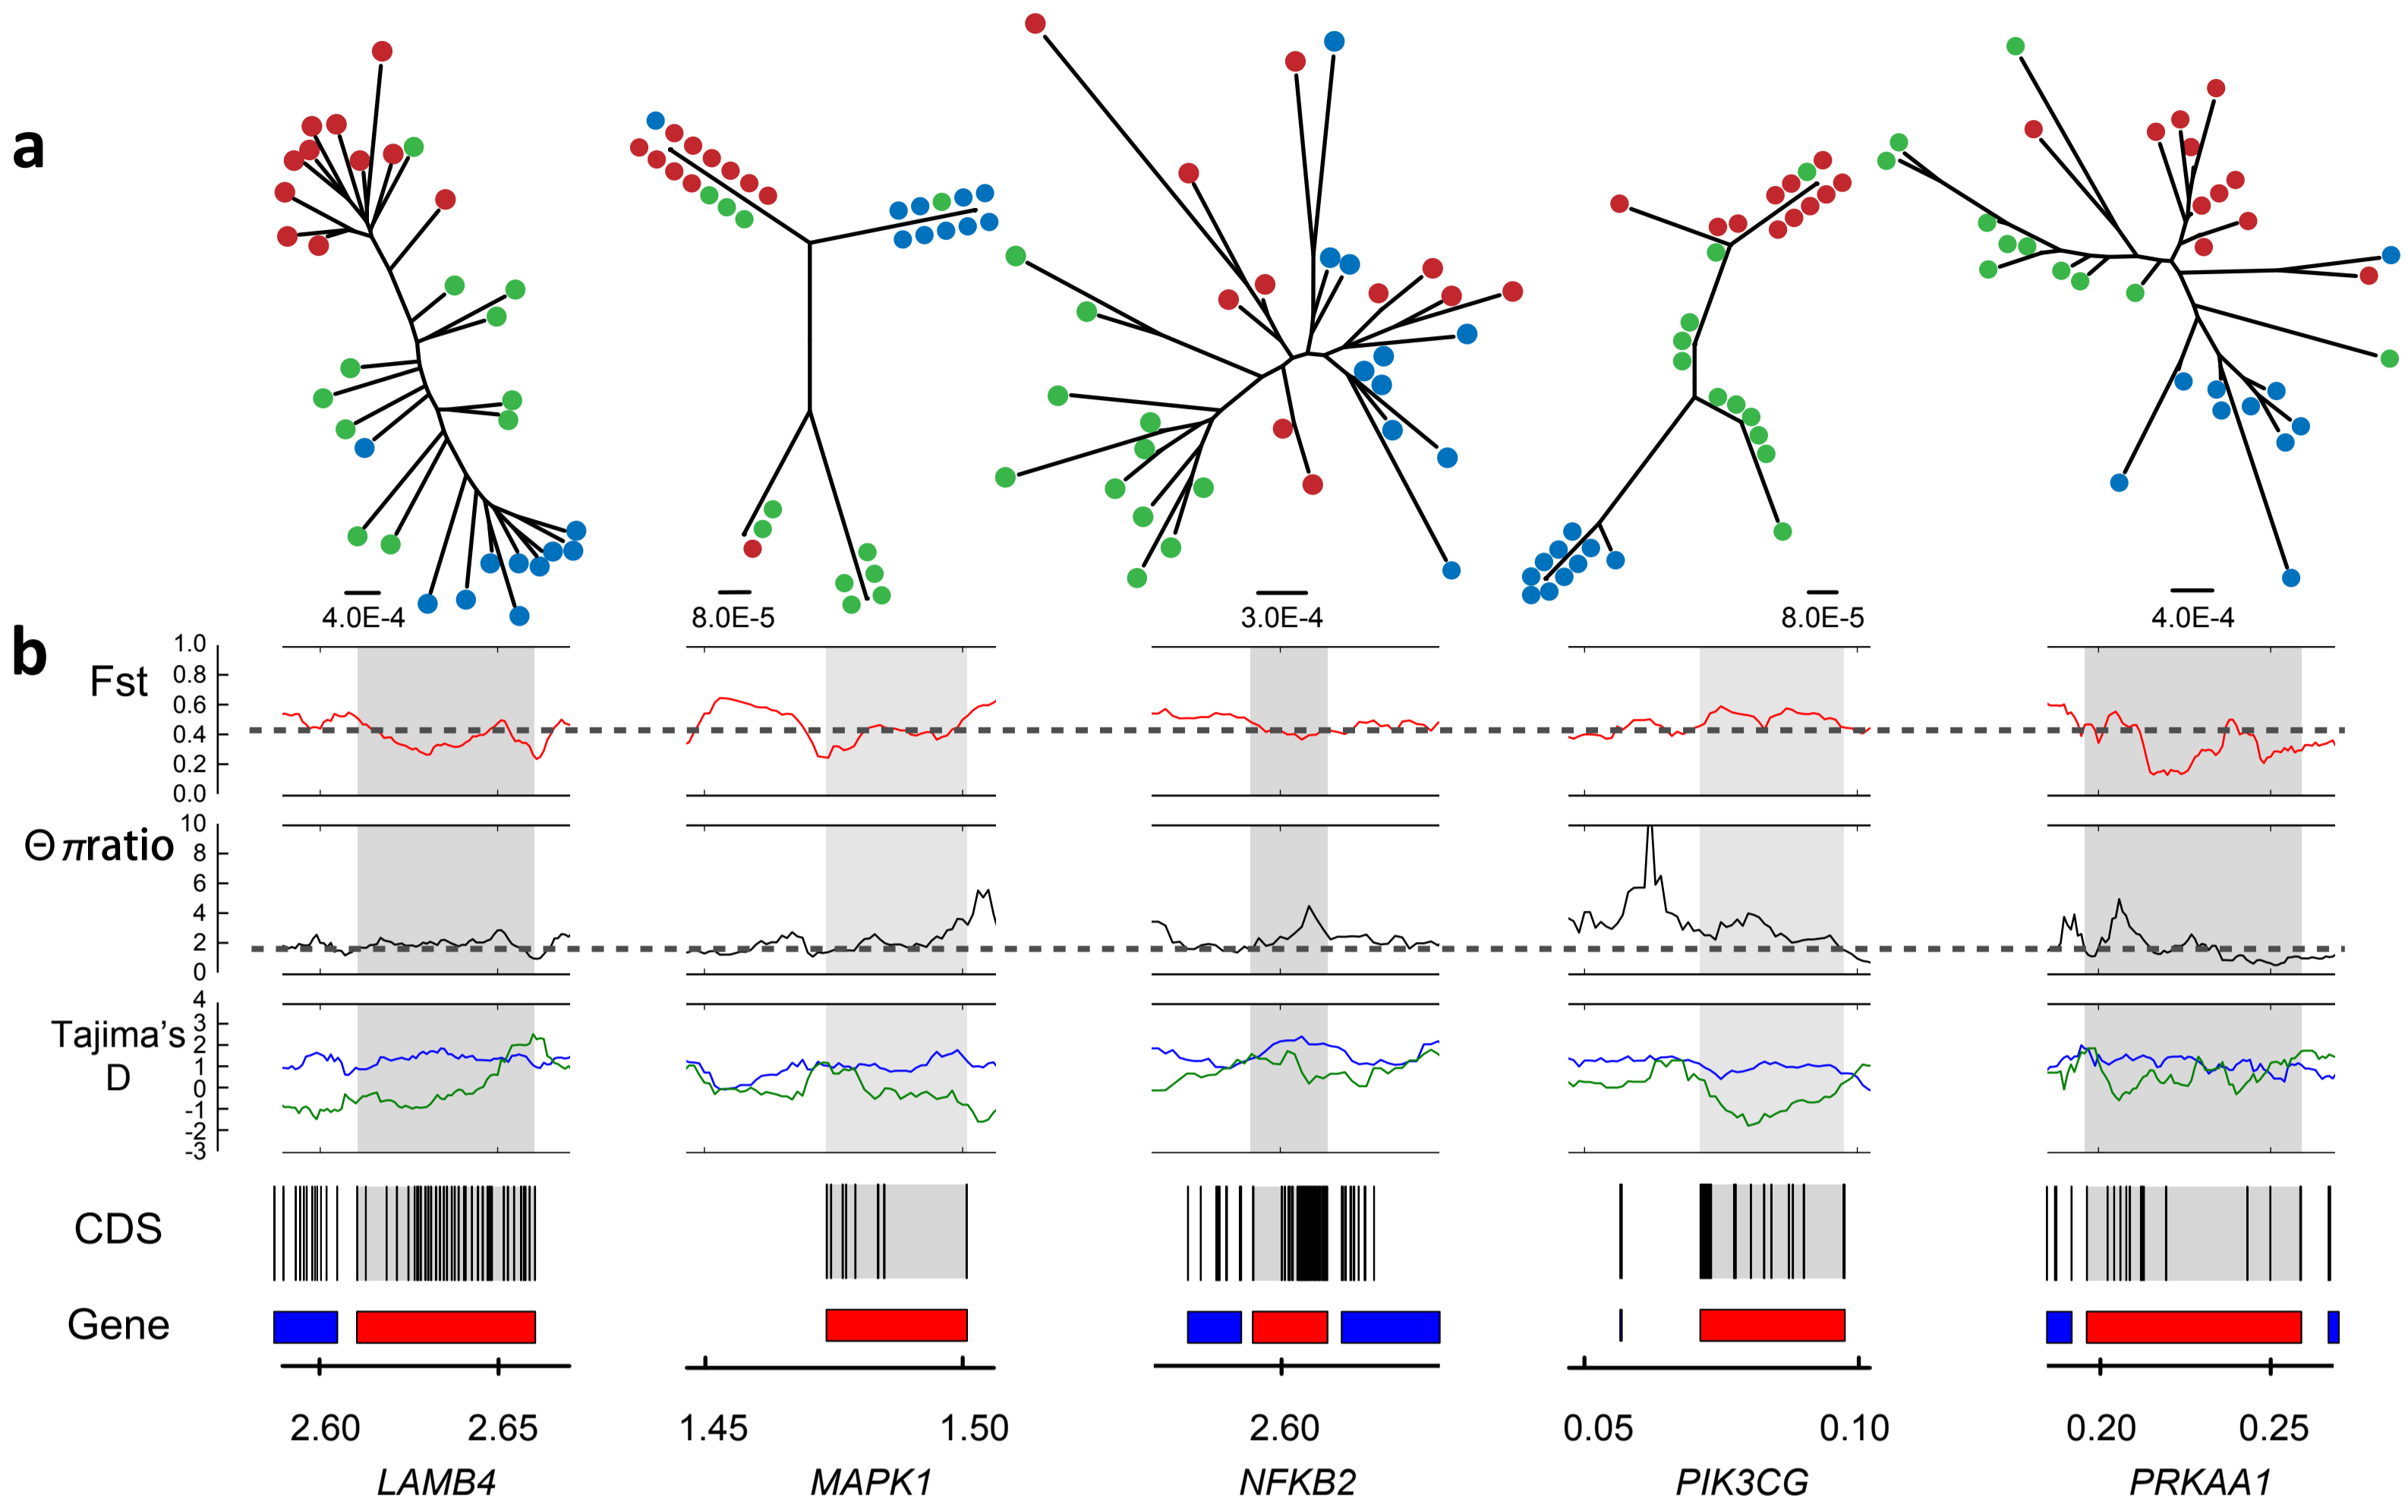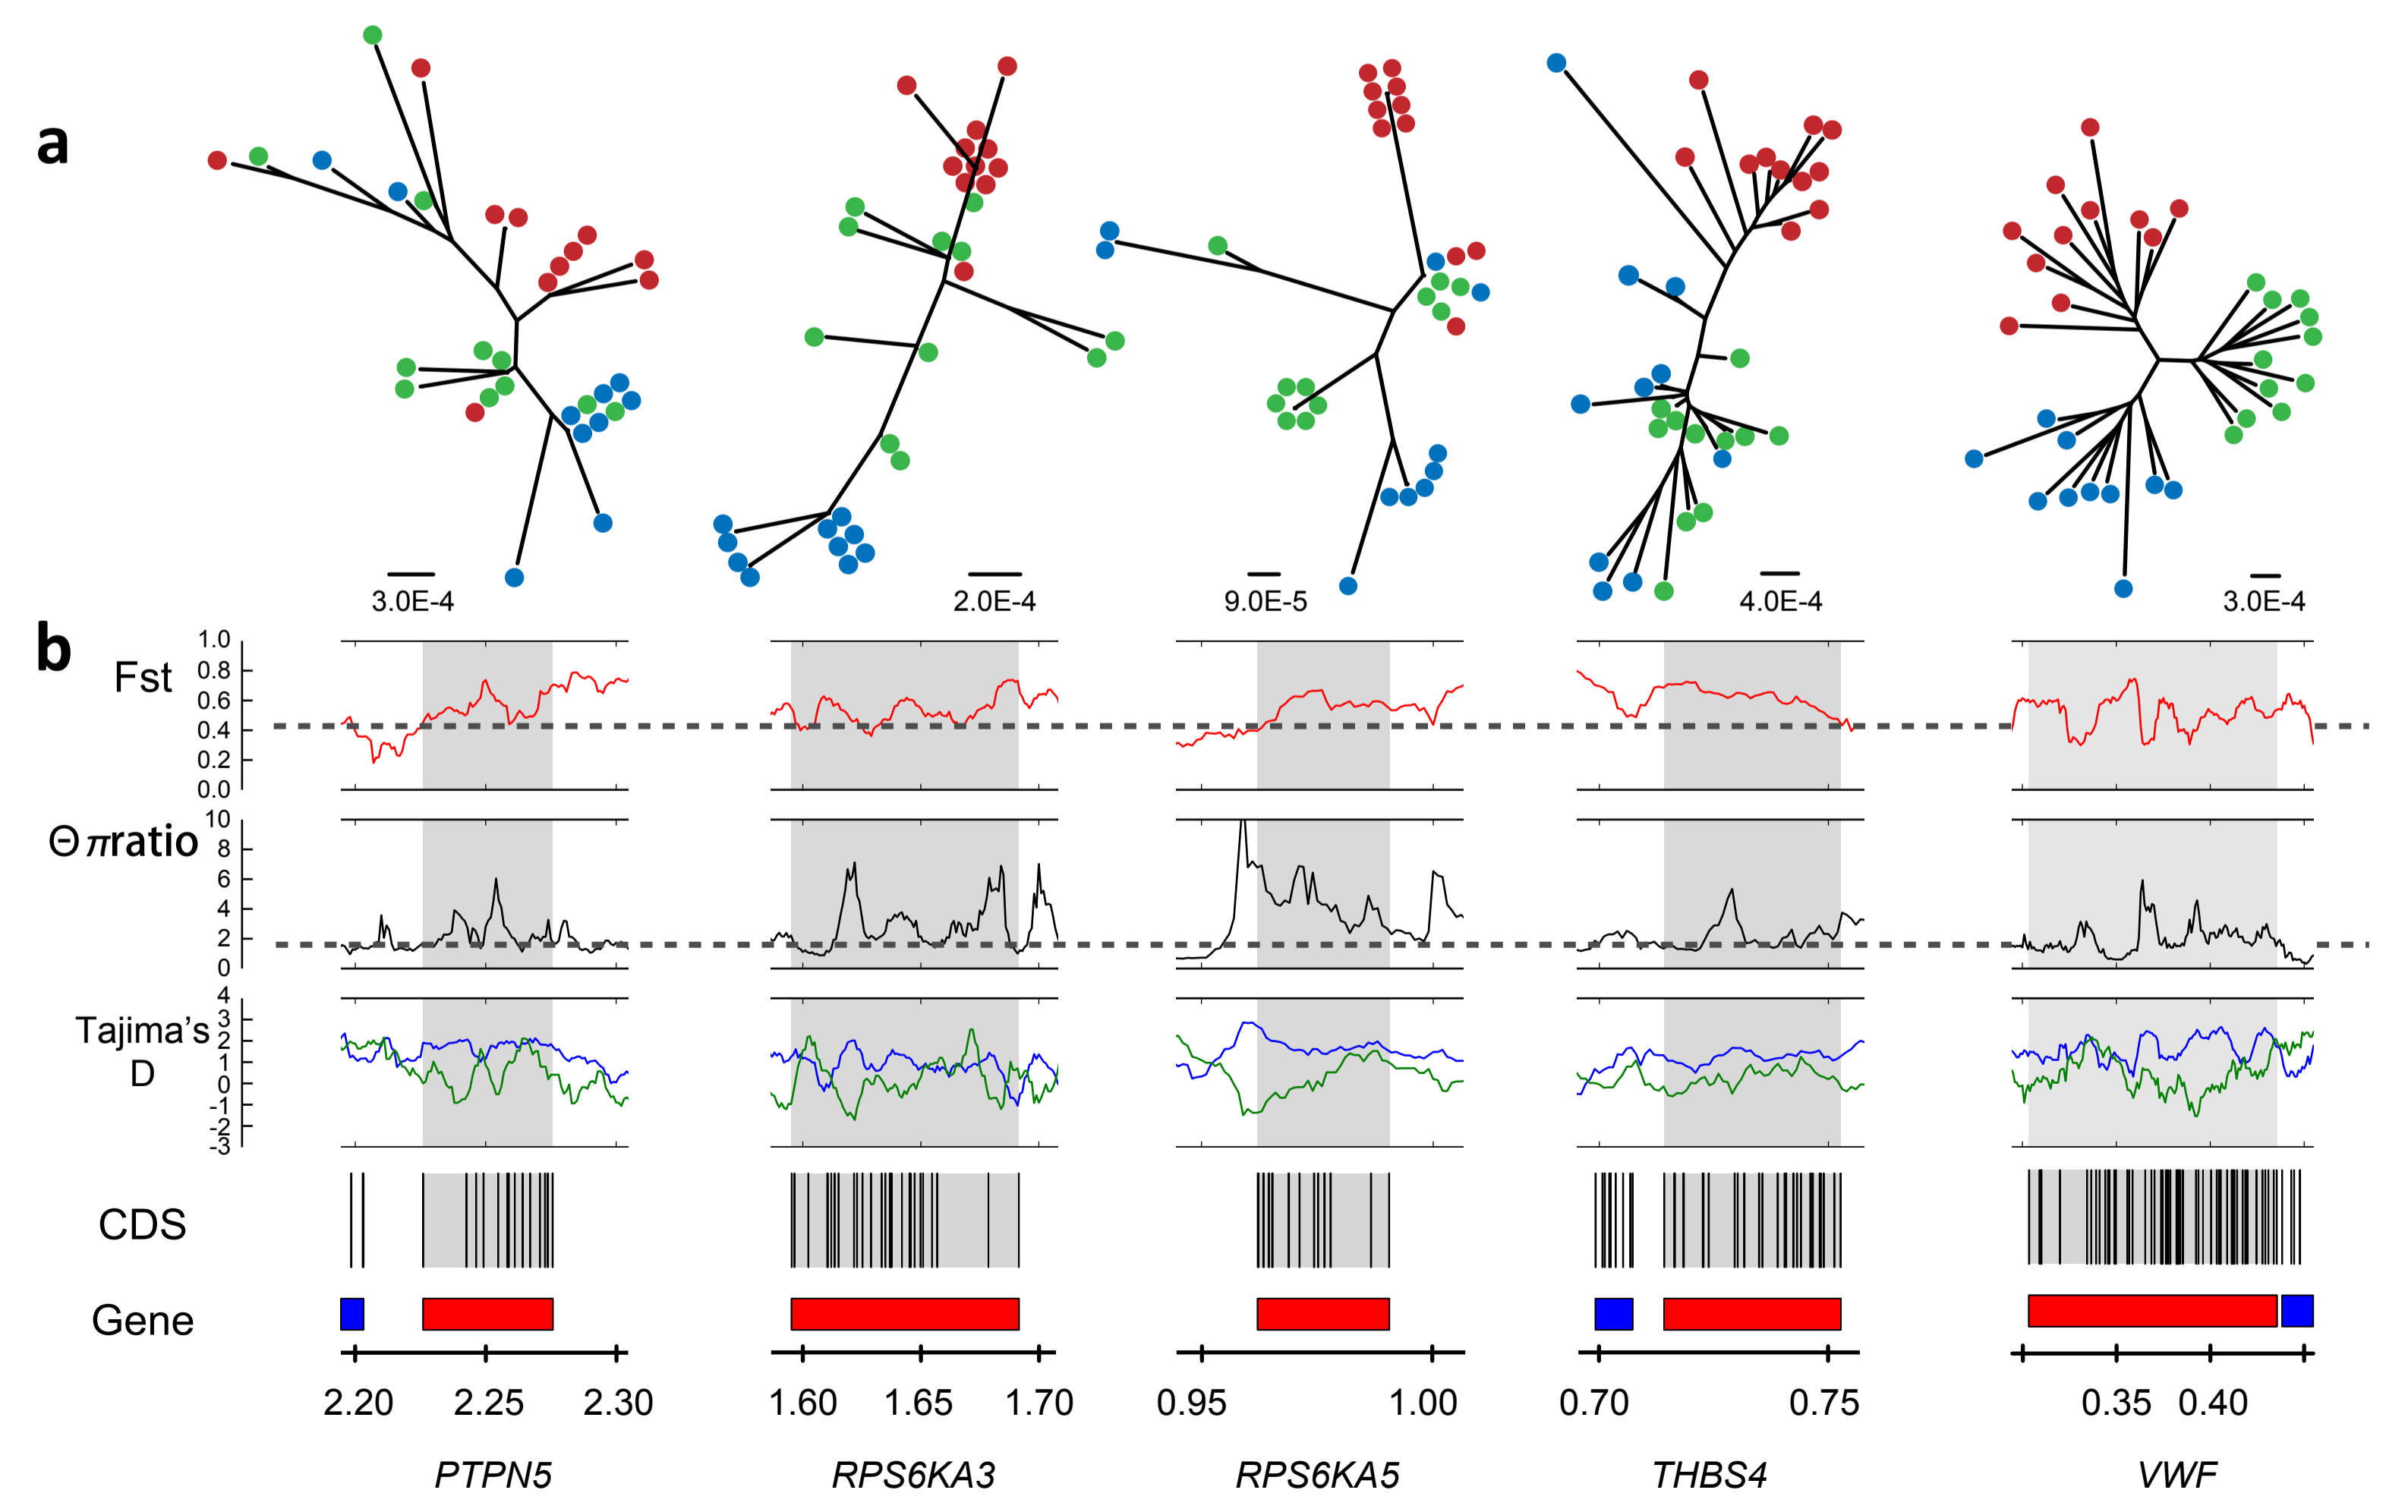

Figure S3

**THBS4**

**F2R**

221

385

Ground tit AV I L W L S G L Q Q G L S T I E L Y L D C L Q V G A I E D

Ground tit I D P F I Y Y Y A S S Q Y Q R Q F F S L F N C K K T F D P N

EH

EH

MON

MON

CE

CE

F

VR

**LAMB4**

**ITGA2**

1187

186

Ground tit L T G Q C P C K P G Y S G R C C N E C E E N Y F G N P Q M Y

Ground tit G R D A R W E R G C E R G A V A A C E C D A S A A I L N Q V

EH

EH

MON

MON

CE

CE

A

F

S

Figure S4

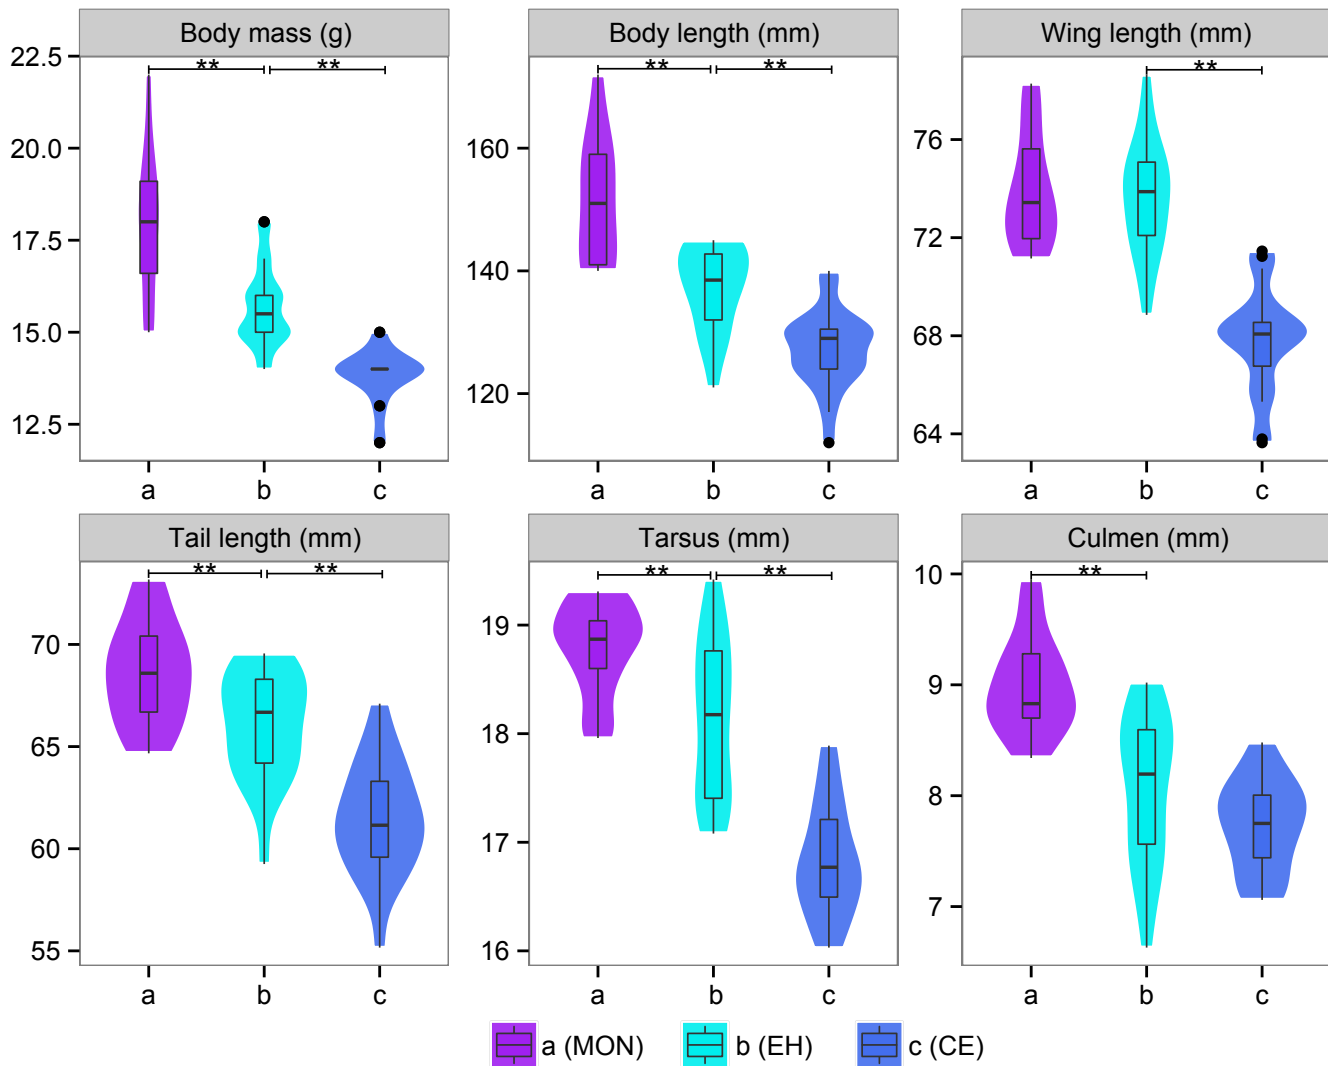

Supplement: srep14256-s1.pdf [file srep14256-s1.pdf]
